# Supplementary material
Source: PubMed Central journal article supplement (PMC7359873)
Supplement: NIHMS1604640-supplement-supplementary_material.pdf [file NIHMS1604640-supplement-supplementary_material.pdf]

**Table S1. Comparison of Clinical Characteristics Between ARDS Patients and Non-ARDS Patients in VUMC Cohort**

|                                 | VUMC Cohort<br>(n=937) |                 | P-value |
|---------------------------------|------------------------|-----------------|---------|
|                                 | Non-ARDS<br>(n=688)    | ARDS<br>(n=249) |         |
| Age (years), mean (SD)          | 53 (17)                | 52 (18)         | 0.23    |
| Male, n (%)                     | 413 (60.0)             | 150 (60.2)      | 1.00    |
| Non-Caucasian, n (%)            | 136 (20)               | 36 (15)         | 0.08    |
| BMI, mean (SD)                  | 29 (8.3)               | 29 (8.3)        | 0.60    |
| Smoking Status, n (%)           |                        |                 | 0.53    |
| None                            | 256 (37)               | 99 (40)         |         |
| Former Smoker                   | 162 (24)               | 50 (20)         |         |
| Current Smoker                  | 221 (32)               | 86 (35)         |         |
| Unknown                         | 49 (7.1)               | 14 (5.6)        |         |
| ARDS Risk Factor, n (%)         |                        |                 | <0.001  |
| Sepsis                          | 156 (23)               | 60 (24)         |         |
| Pneumonia                       | 51 (7.5)               | 54 (22)         |         |
| Severe Trauma                   | 186 (28)               | 89 (36)         |         |
| Aspiration                      | 26 (3.8)               | 31 (12)         |         |
| Others                          | 257 (36)               | 15 (6.0)        |         |
| PaO2/FiO2 Ratio, mean (SD)      | 248 (126)              | 155 (86)        | <0.001  |
| APACHE II score, mean (SD)      | 24.6 (8.1)             | 28.7 (7.1)      | <0.001  |
| Organ Failure, n (%)            | 519 (75)               | 202 (81)        | 0.08    |
| Circulatory Failure             | 418 (61)               | 173 (70)        | 0.02    |
| Coagulation Failure             | 137 (20)               | 49 (20)         | 1.00    |
| Hepatic failure                 | 98 (14)                | 35 (14)         | 1.00    |
| Renal failure                   | 194 (28)               | 52 (21)         | 0.03    |
| Vasopressors, n (%)             | 234 (34)               | 124 (50)        | <0.001  |
| Telomere length (kb), mean (SD) | 6.95 (0.77)            | 6.93 (0.84)     | 0.69    |

**Abbreviations:** SD, standard deviation; BMI, body mass index; ARDS, acute respiratory distress syndrome; APACHE, Acute Physiology and Chronic Health Evaluation.

**Table S2. Association Between PBL-TL and Mortality in VUMC Cohort Analyzing by Logistic Regression Models**

| Telomere Length<br>(Per 1kb decrease) | 60-Day Mortality  |         | 90-Day Mortality  |         | One-Year Mortality |         |
|---------------------------------------|-------------------|---------|-------------------|---------|--------------------|---------|
|                                       | OR (95% CI)       | P-value | OR (95% CI)       | P-value | OR (95% CI)        | P-value |
| VUMC Cohort (n=937)                   |                   |         |                   |         |                    |         |
| Unadjusted                            | 1.52 (1.25 -1.87) | <0.0001 | 1.67 (1.37- 2.04) | <0.0001 | 1.11 (1.11-1.15)   | <0.0001 |
| Adjusted <sup>1</sup>                 | 1.24 (0.99-1.56)  | 0.057   | 1.36 (1.09-1.71)  | 0.006   | 1.29 (1.05-1.58)   | 0.015   |
| VUMC Sepsis Subgroup (n=368)          |                   |         |                   |         |                    |         |
| Unadjusted                            | 1.68 (1.23-2.31)  | 0.001   | 1.78 (1.31-2.46)  | 0.0003  | 1.64 (1.23-2.21)   | 0.0009  |
| Adjusted <sup>1</sup>                 | 1.59 (1.14-2.23)  | 0.007   | 1.67 (1.20-2.34)  | 0.003   | 1.47 (1.08-2.02)   | 0.015   |

<sup>1</sup>Adjusted for age, male sex, ethnicity, smoking status, and APACHE II Score.

**Table S3. Relationship of PBL-TL to 90-day Survival Using Multivariable Survival Analysis of Trauma Patients in VUMC Cohort**

| Multivariable Analysis<br>(Individual Covariates) | VUMC Trauma Subgroup<br>(n=281) |         |
|---------------------------------------------------|---------------------------------|---------|
|                                                   | HR (95% CI)                     | P-value |
| Age                                               | 1.04 (1.02-1.07)                | <0.0001 |
| Male Sex                                          | 0.81 (0.42-1.56)                | 0.53    |
| Ethnicity (Non-Caucasian)                         | 0.83 (0.31-2.3)                 | 0.72    |
| Smoking Status (Never Smoking)                    | 1.01 (0.53-1.94)                | 0.97    |
| APACHE II Score                                   | 1.08 (1.03-1.13)                | 0.0007  |
| Telomere Length (Per 1 kb decrease)               | 0.90 (0.75-1.65)                | 0.59    |

Abbreviations: APACHE, Acute Physiology and Chronic Health Evaluation; HR, Hazard Ratio.

**Table S4. Comparison of Clinical Characteristics of Critically Ill Patients with Sepsis between VUMC Cohort and UCSF Cohort**

|                                 | VUMC Sepsis Subgroup<br>(n=368) | UCSF Sepsis Cohort<br>(n=394) | P-value |
|---------------------------------|---------------------------------|-------------------------------|---------|
| Age (years), mean (SD)          | 55 (16)                         | 66 (16)                       | <0.001  |
| Male, n (%)                     | 199 (54)                        | 221 (56)                      | 0.63    |
| Non-Caucasian, n (%)            | 71 (19)                         | 193 (49.0)                    | <0.001  |
| BMI, mean (SD)                  | 29(8.8)                         | 28 (23)                       | 0.51    |
| Smoking Status, n (%)           |                                 |                               | <0.001  |
| None                            | 140 (38.0)                      | 198 (50.4)                    |         |
| Former Smoker                   | 106 (28.8)                      | 133 (33.8)                    |         |
| Current Smoker                  | 109 (29.6)                      | 47 (12.0)                     |         |
| Unknown                         | 13 (3.5)                        | 15 (3.8)                      |         |
| ARDS, n (%)                     | 151 (41.0)                      | 123 (35.0)                    | 0.12    |
| ARDS Risk Factor, n (%)         |                                 |                               | <0.001  |
| Sepsis                          | 208 (56.7)                      | 220 (55.8)                    |         |
| Pneumonia                       | 95 (26)                         | 140 (36)                      |         |
| Aspiration                      | 34 (9.3)                        | 29 (7.4)                      |         |
| Others                          | 30 (8.2)                        | 5 (1.3)                       |         |
| PaO2/FiO2 Ratio, mean (SD)      | 196 (124)                       | 209 (131)                     | 0.27    |
| APACHE II score, mean (SD)      | 27.7 (8.45)                     | 24.6 (10)                     | <0.001  |
| Organ Failure, n (%)            | 317 (86.1)                      | 308 (78.2)                    | 0.006   |
| Circulatory Failure             | 269 (73.1)                      | 241(61.5)                     | 0.001   |
| Coagulation Failure             | 57 (16)                         | 55 (14)                       | 0.69    |
| Hepatic failure                 | 77 (21)                         | 62 (20)                       | 0.71    |
| Renal failure                   | 140 (38.0)                      | 118 (30.3)                    | 0.031   |
| Vasopressors, n (%)             | 181 (49.2)                      | 172 (43.7)                    | 0.15    |
| Telomere length (kb), mean (SD) | 6.84 (0.75)                     | 6.19 (0.62)                   | <0.001  |

Abbreviations: SD, standard deviation; BMI, body mass index; ARDS, acute respiratory distress syndrome; APACHE, Acute Physiology and Chronic Health Evaluation.

**Figure S1. Venn Diagram of Subgroups in VUMC Cohort**

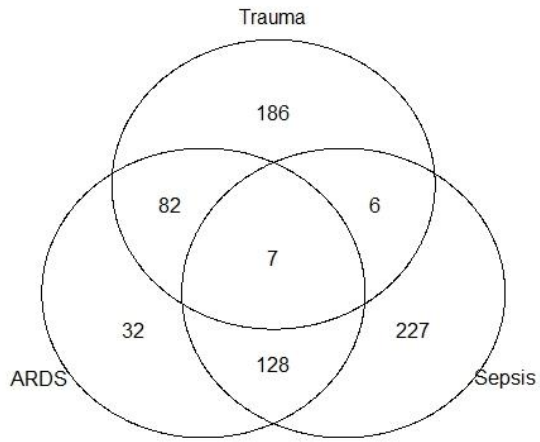

**Figure S2. Histogram of PBL-TL in VUMC Cohort and UCSF Sepsis Cohort**

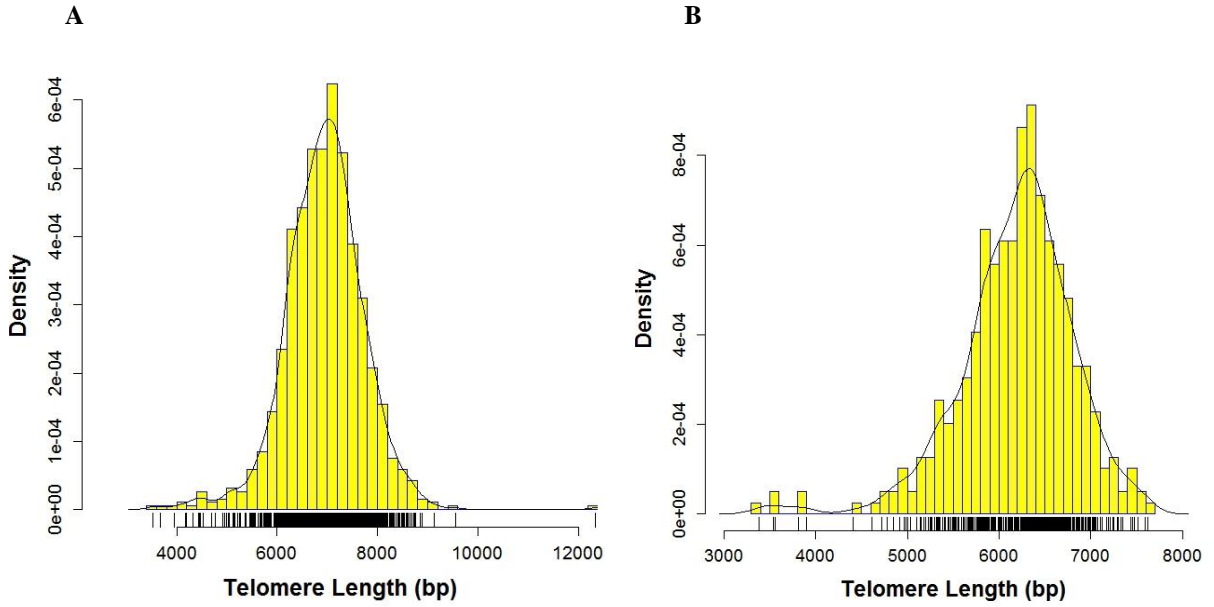

(A) VUMC cohort. (B) UCSF sepsis cohort.

Abbreviations: bp, base pairs.

**Figure S3. Relationship between PBL-TL and measures of organ failure in overall VUMC Cohort:**

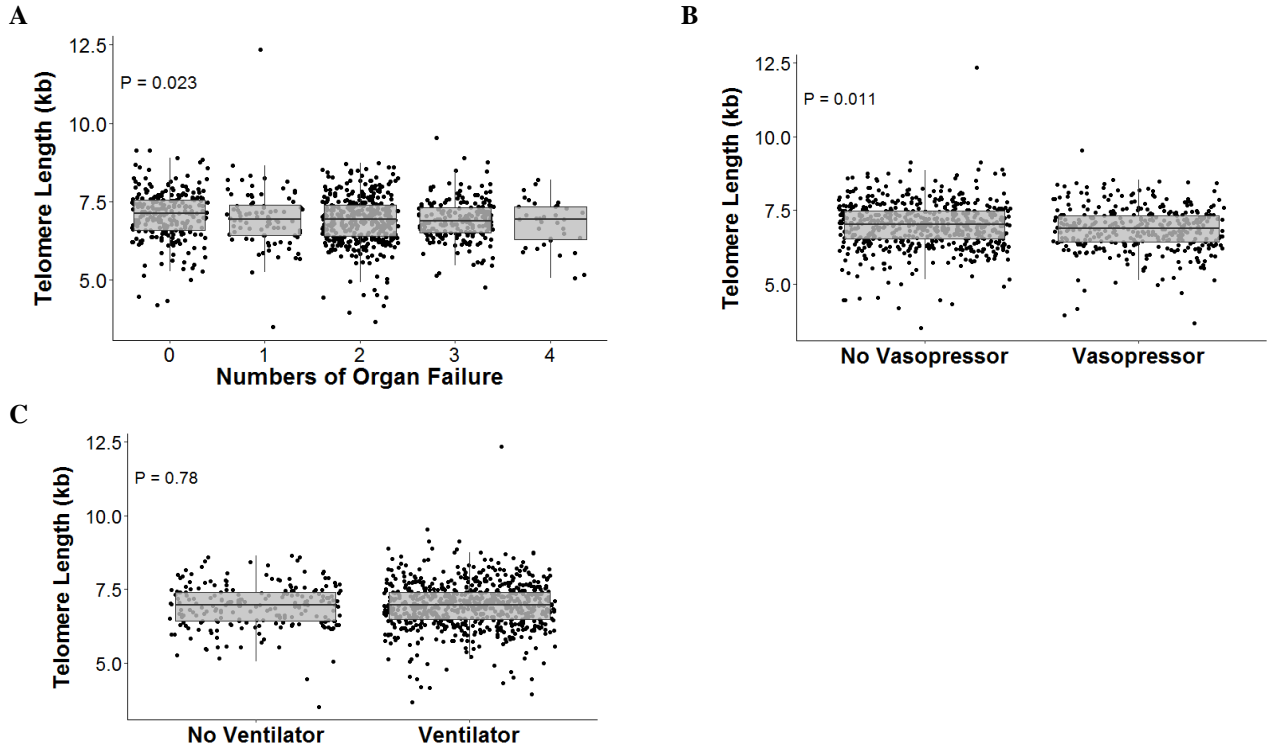

(A) Numbers of failed organs, (B) Vasopressor use, and (C) Use of mechanical ventilation.

**Figure S4. Relationship between PBL-TL and measures of organ failure in VUMC sepsis Subgroup:**

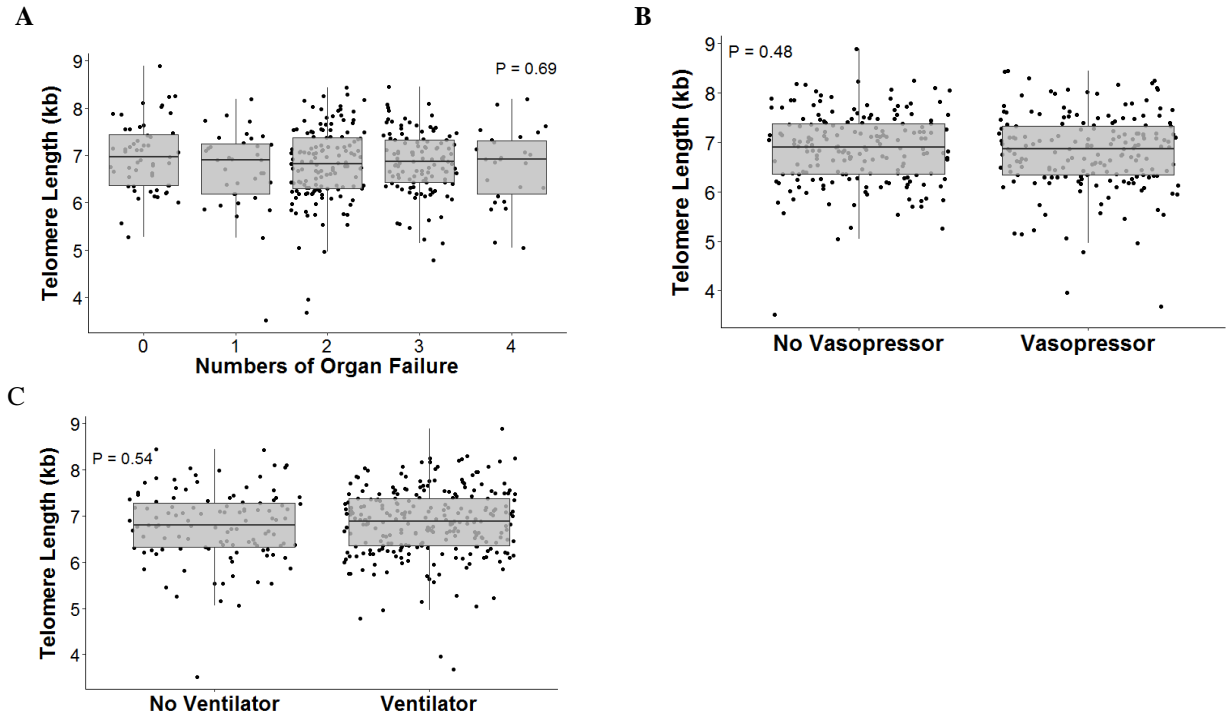

(A) Numbers of failed organs, (B) Vasopressor use, and (C) Use of mechanical ventilation.
